# Supplementary material for: Major nuclear locales define nuclear genome organization and function beyond A and B compartments
Source: eLife. 2025 Apr 25;13:RP99116. doi: 10.7554/eLife.99116 (PMC12029212; doi:10.7554/eLife.99116)
Supplement: Supplementary file 1. — This file contains five sheets listing TSA-seq, DamID seq, Repli-seq, ChIP-seq, and RNA-seq datasets. [file elife-99116-supp1.xlsx]

## Sheet: TSA-seq
Experiment Set Accession	Experiment Type	Assay Details	Biosource	Dataset	Biological replicates	Source
4DNESO6HFSAD	TSA-seq	NIFK protein	H1-hESC (Tier 1)	TSA-seq MKI67IP in H1 cells	2	Current study
4DNESGGXKI1H	TSA-seq	LMNB1 protein	H1-hESC (Tier 1)	TSA-seq v2 Lamin B1 in H1 cells	2	Current study
4DNESC3D6NGQ	TSA-seq	SON protein	H1-hESC (Tier 1)	TSA-seq v2 SON in H1 cells	2	Current study
4DNESAHA7E69	TSA-seq	NIFK protein	HCT116 (Tier 2)	TSA-seq MKI67IP in HCT116 cells	2	Current study
4DNESTE8NJOE	TSA-seq	LMNB1 protein	HCT116 (Tier 2)	TSA-seq v1 Lamin B1 in HCT116	2	Current study
4DNESH8LXMG3	TSA-seq	SON protein	HCT116 (Tier 2)	TSA-seq v2 SON in HCT116. cells	2	Current study
4DNESGAR9ZBW	TSA-seq	NIFK protein	HFFc6 (Tier 1)	TSA-seq MKI67IP in HFFc6 cells	2	Current study
4DNESMF4T7QQ	TSA-seq	LMNB1 protein	HFFc6 (Tier 1)	TSA-seq v2 Lamin B1 in HFFc6	2	Current study
4DNES85R9TIB	TSA-seq	SON protein	HFFc6 (Tier 1)	TSA-seq v2 SON in HFFc6 cells	2	Current study
4DNESA1Z2ZVR	TSA-seq	LaminB1:B2	K562 (Tier 2)	TSA-seq v1 LaminB in K562	2	Current study
4DNESI714SZN	TSA-seq	NIFK protein	K562 (Tier 2)	TSA-seq MKI67IP in k562 cells	2	Current study
4DNESW3L596Q	TSA-seq	SON protein	K562 (Tier 2)	TSA-seq v2 SON in K562 cells	2	Current study
4DNESXHWK24G	TSA-seq	NIFK protein	K562 clone 5 with LMNA, LBR double knockout	TSA-seq v2 MKI67IP in lmna-lbr-ko k562 cells	2	Current study
4DNESICMN7RP	TSA-seq	LMNB1 protein	K562 clone 5 with LMNA, LBR double knockout	TSA-seq v2 Lamin B1 in lmna-lbr-ko k562 cells	2	Current study
4DNES2ZND18K	TSA-seq	SON protein	K562 clone 5 with LMNA, LBR double knockout	TSA-seq v2 SON in lmna-lbr-ko k562 cells	2	Current study
GSE154095	TSA-seq	SON protein	IMR90	TSA-seq v2 SON in IMR90 cells		https://doi.org/10.1016/j.molcel.2021.03.006

## Sheet: DamID
Experiment Set Accession	Experiment Type	Assay Details	Biosource	Dataset	Biological replicates	Source
4DNESXKBPZKQ	DamID-seq	LMNB1 protein	H1-hESC (Tier 1)	DamID-seq on H1-hESC cells (2017-12-14)	3	Current study
4DNES24XA7U8	DamID-seq	LMNB1 protein	HCT116 (Tier 2)	DamID-seq on HCT116 cells (2018-10-22)	3	Current study
4DNESXZ4FW4T	DamID-seq	LMNB1 protein	HFFc6 (Tier 1)	DamID-seq on HFFc6 cells (2017-12-14)	3	Current study
4DNESTAJJM3X	DamID-seq	LMNB1 protein	K562 (Tier 2)	DamID-seq on K562 cells (2018-10-22)	3	Current study
GSE263012	DamID-seq	LMNB1 protein	K562 (wt)	DamID-seq on K562 cells (2018-10-22)	3	Current study
GSE263012	DamID-seq	LMNB1 protein	K562 clone 5 with LMNA, LBR double knockout	DamID-seq on K562 cells (2018-10-22)	3	Current study

## Sheet: Repli-seq
Experiment Set Accession	Experiment Type	Assay Details	Biosource	Dataset	Biological replicates	Source
4DNESIB37EU2	Replication timing	2-stage Repli-seq	HFFc6 (Tier 1)	E/L repliseq on HFFc6 cells - Gold Standard (2018-02-06)	2	4DN
4DNESEJCRVNR	Replication timing	2-stage Repli-seq	H1-hESC (Tier 1)	E/L repliseq on H1-hESC cells (2017-08-17)	2	4DN
4DNESXPNEE4Q	Replication timing	2-stage Repli-seq	HCT116 (Tier 2)	E/L repliseq on HCT116 cells (2017-08-17)	2	4DN
4DNESC2VFNP2	Replication timing	2-stage Repli-seq	K562 (Tier 2)	E/L repliseq on K562 cells (2017-08-17)	2	4DN
4DNESXRBILXJ	Replication timing	Multi-stage Repli-seq	H1-hESC (Tier 1)	16-fraction Repli-seq on H1-hESC	2	https://doi.org/10.1186/s13059-020-01983-8
4DNESNGZM5FG	Replication timing	Multi-stage Repli-seq	HCT116 (Tier 2)	16-fraction Repli-seq on HCT116	2	https://doi.org/10.1186/s13059-020-01983-8
GSE263012	Replication timing	2-stage Repli-seq	K562 (wt)	E/L repliseq on K562 cells	2	Current study
GSE263012	Replication timing	2-stage Repli-seq	K562 clone 5 with LMNA, LBR double knockout	E/L repliseq on K562 cells	2	Current study

## Sheet: ChIP_Seq
Cell type	Target	Technique	FoldChange	pvalue	Source
K562	H3K79me2	ChIP-seq	ENCFF957YJT	ENCFF213LKE	ENCODE
K562	H3K4me3	ChIP-seq	ENCFF660WUG	ENCFF767UON	ENCODE
K562	H3K4me2	ChIP-seq	ENCFF959YJV	ENCFF054RSU	ENCODE
K562	H3K27me3	ChIP-seq	ENCFF405HIO	ENCFF665RDD	ENCODE
K562	H3K36me3	ChIP-seq	ENCFF163NTH	ENCFF296TSL	ENCODE
K562	H4K20me1	ChIP-seq	ENCFF605FAF	ENCFF694ODT	ENCODE
K562	H3K4me1	ChIP-seq	ENCFF834SEY	ENCFF100FDI	ENCODE
K562	H3K9me3	ChIP-seq	ENCFF601JGK	ENCFF632NQA	ENCODE
K562	H3K9ac	ChIP-seq	ENCFF286WRJ	ENCFF239EBH	ENCODE
K562	H3K27ac	ChIP-seq	ENCFF849TDM	ENCFF469JMR	ENCODE
K562	H2AFZ	ChIP-seq	ENCFF621DJP	ENCFF202EVH	ENCODE
HCT116	H2AFZ	ChIP-seq	ENCFF863EHT	ENCFF763QXL	ENCODE
HCT116	H3K27me3	ChIP-seq	ENCFF717ZKL	ENCFF232QSG	ENCODE
HCT116	H3K9me3	ChIP-seq	ENCFF254TIW	ENCFF572IBD	ENCODE
HCT116	H3K4me1	ChIP-seq	ENCFF239FXT	ENCFF182EJH	ENCODE
HCT116	H3K36me3	ChIP-seq	ENCFF024LGD	ENCFF415LBK	ENCODE
HCT116	H4K20me1	ChIP-seq	ENCFF349NQI	ENCFF471QCK	ENCODE
HCT116	H3K79me2	ChIP-seq	ENCFF631DLM	ENCFF780NVL	ENCODE
HCT116	H3K27ac	ChIP-seq	ENCFF787LMI	ENCFF997CJQ	ENCODE
HCT116	H3K4me2	ChIP-seq	ENCFF693HVA	ENCFF624KAH	ENCODE
HCT116	H3K4me3	ChIP-seq	ENCFF649ZLF	ENCFF394IMO	ENCODE
HCT116	H3K9me2	ChIP-seq	ENCFF630HKF	ENCFF814BPD	ENCODE
HCT116	H3K9ac	ChIP-seq	ENCFF743PJP	ENCFF558LSB	ENCODE
H1	H3K27ac	ChIP-seq	ENCFF423TVA	ENCFF455PUU	ENCODE
H1	H3K4me1	ChIP-seq	ENCFF584AVI	ENCFF335ZGP	ENCODE
H1	H3K27me3	ChIP-seq	ENCFF912ZUR	ENCFF277UCT	ENCODE
H1	H3K9ac	ChIP-seq	ENCFF795DQH	ENCFF890MIB	ENCODE
H1	H3K36me3	ChIP-seq	ENCFF422PZQ	ENCFF687LJF	ENCODE
H1	H3K9me3	ChIP-seq	ENCFF579PBG	ENCFF358AWN	ENCODE
H1	H3K4me2	ChIP-seq	ENCFF142UOO	ENCFF501AUN	ENCODE
H1	H3K79me2	ChIP-seq	ENCFF854LTH	ENCFF640WRD	ENCODE
H1	H2AFZ	ChIP-seq	ENCFF775ZWT	ENCFF758YFI	ENCODE
H1	H3K4me3	ChIP-seq	ENCFF629XVB	ENCFF252FBN	ENCODE
H1	H4K20me1	ChIP-seq	ENCFF067XIV	ENCFF453OCL	ENCODE
HFFc6	H3K27ac	ChIP-seq	4DNFINRI6WOL	-	4DN
HFFc6	H3K4me1	ChIP-seq	4DNFI3WBAYI7	-	4DN
HFFc6	H3K4me3	ChIP-seq	4DNFIVYWZE1W	-	4DN
HFFc6	H2AFZ	Imputed ChIP-seq	4DNFIB79WDUY	-	4DN-Avacado imputed
HFFc6	H3K27me3	Imputed ChIP-seq	4DNFIMJHO898	-	4DN-Avacado imputed
HFFc6	H3K36me3	Imputed ChIP-seq	4DNFIDU8WT76	-	4DN-Avacado imputed
HFFc6	H3K4me2	Imputed ChIP-seq	4DNFIFB7SHA1	-	4DN-Avacado imputed
HFFc6	H3K79me2	Imputed ChIP-seq	4DNFIBS37Z1K	-	4DN-Avacado imputed
HFFc6	H3K9ac	Imputed ChIP-seq	4DNFINBZ9NNY	-	4DN-Avacado imputed
HFFc6	H3K9me3	Imputed ChIP-seq	4DNFILJFE7WW	-	4DN-Avacado imputed
HFFc6	H4K20me1	Imputed ChIP-seq	4DNFI13RAB7H	-	4DN-Avacado imputed
HFFc6	H3K4me3	Mint-ChIP-seq	ENCFF995LLA	ENCFF598MLG	ENCODE
HFFc6	H3K27ac	Mint-ChIP-seq	ENCFF426TLD	ENCFF644GJB	ENCODE
HFFc6	H3K36me3	Mint-ChIP-seq	ENCFF070SWD	ENCFF431XVV	ENCODE
HFFc6	H3K9me3	Mint-ChIP-seq	ENCFF690KUY	ENCFF542CZT	ENCODE
HFFc6	H3K4me1	Mint-ChIP-seq	ENCFF994SSG	ENCFF834VWT	ENCODE

## Sheet: RNA_Seq
Accession ID	Target	Cell type	Biological replicates	Data Source
GSE263012	RNA_Seq	K562 (wt)	3	Current study
GSE263012	RNA_Seq	K562 clone 5 with LMNA, LBR double knockout	3	Current study
ENCFF928NYA	RNA_Seq	K562		ENCODE
ENCFF435PHM	RNA_Seq	HCT116		ENCODE
ENCFF174OMR	RNA_Seq	H1		ENCODE
4DNFI5MR6C3G	RNA_Seq	HFF		4DN
